# Supplementary material for: Preformed Elastodontic Appliances: Awareness and Attitude of Orthodontists and General Dental Practitioners
Source: MDPI journal article supplement (doi:10.3390/children11040418), 2024-04-01
Supplement: s1 [file s1]

Section 1 – Sociodemographic characteristics of the respondents

**1. Are you a...?**

- ☐ Orthodontist (with a Specialty or a recognized Degree in Orthodontics)
- ☐ General dentist or specialist in other dental disciplines (non-orthodontist)

**2. What is your age?**

- ☐ 30 or younger
- ☐ 31-40 years
- ☐ 41-50 years
- ☐ More than 50 year

**3. What is your gender?**

- ☐ Male
- ☐ Female
- ☐ Non binary
- ☐ Prefer not to answer

**4. How many years have you been in the dental profession?**

- ☐ 1-5 years
- ☐ 6-10 years
- ☐ 11-20 years
- ☐ More than 20 years

**5. What is your mainly practice type?**

- ☐ Private practice solo
- ☐ Private practice team
- ☐ Consultant activity
- ☐ University/ academic staff
- ☐ Hospital staff

Section 2: general awareness of EAs

**6. How do you rate your knowledge about the Elastodontic Appliances?**

- ☐ I am adequately informed
- ☐ I know little, but I am interested in increasing my knowledge
- ☐ I know little, and I am not interested in increasing my knowledge
- ☐ I have never heard of these devices

**7. How did you obtain your knowledge about the Elastodontic Appliances?**

- ☐ Undergraduate education
- ☐ Discussing with colleagues
- ☐ Postgraduate courses/Webinar
- ☐ Scientific articles/books
- ☐ Sales representative or advertising brochures/flyers
- ☐ I have never heard of these devices

**8. Do you currently use the Elastodontic Appliances in your practice?**

- ☐ Yes
- ☐ No

*(If you answered **Yes**, please go the Section 3;*

*If you answered **No**, please go to the Section 4)*

Section 3 – Clinical experience with EA

**9. How long have you been using Elastodontic Appliances in your practice?**

- ☐ Less than 12 months
- ☐ 1 to 5 years
- ☐ 6 to 10 years
- ☐ More than 10 years

**10. How many treatments with Elastodontic Appliances have you started in the last year?**

- ☐ 1-10
- ☐ 11-20
- ☐ 21-30
- ☐ 31-40
- ☐ 41-50
- ☐ 50+

**11. At what stage of dental eruption do you usually use Elastodontic Appliances?**

- ☐ During primary dentition
- ☐ During early mixed dentition
- ☐ During late mixed dentition
- ☐ During permanent dentition

**12. What do you mainly use Elastodontic Appliances for? (Several responses are possible)**

- ☐ Correction of oral bad habits
- ☐ Correction of deep bite
- ☐ Correction of open bite
- ☐ Correction of dental or skeletal sagittal Class II
- ☐ Correction of dental or skeletal sagittal Class III
- ☐ Correction of teeth crowding
- ☐ Correction of interincisor diastema
- ☐ Correction of posterior cross bite/scissor bite

**13. Which level of dental crowding do you treat with Elastodontic Appliances? (Several responses are possible)**

- ☐ Only mild dental crowding (1-3 mm)
- ☐ Dental crowding from mild to moderate (4-6 mm)
- ☐ Dental crowding from mild to severe (7+ mm)
- ☐ I do not use Elastodontic Appliances to correct dental crowding

**14. Which measurement of OVJ do you treat with Elastodontic Appliances? (Several responses are possible)**

- ☐ OVJ<0 mm (anterior cross bite)
- ☐ OVJ=4-6 mm
- ☐ OVJ=6-8 mm
- ☐ OVJ>8 mm
- ☐ I do not use Elastodontic Appliances to correct OVJ

**15. Which measurement of OVB do you treat with EPA? (Several responses are possible)**

- ☐ OVB<0 mm (open bite)
- ☐ OVB=4-6 mm
- ☐ OVB=6-8 mm
- ☐ OVB>8mm
- ☐ I do not use Elastodontic Appliances to correct OVB

**16. Have you ever used Elastodontic Appliances together with fixed orthodontic appliances (any type)?**

- ☐ Yes.
- ☐ No

**17. What is the adverse effect of treatment with Elastodontic Appliances that patient (or parents) more frequently report?**

- ☐ None
- ☐ Headache
- ☐ Toothache
- ☐ Facial muscle pain
- ☐ TMJ pain
- ☐ Other

(Please, specify:\_\_\_\_\_)

**18. Compared to a treatment with traditional appliances (fixed or removable), each session of Elastodontic Appliance treatment takes...?**

- ☐ Longer time
- ☐ Less time
- ☐ Same time

**19. Compared to a treatment with traditional appliances (fixed or removable), the overall Elastodontic Appliance treatment takes...?**

- ☐ Longer time
- ☐ Less time
- ☐ Same time

**20. Compared to patients treated with traditional appliances (fixed or removable), the cooperation of patients with Elastodontic Appliances is... ?**

- ☐ Greater
- ☐ Less
- ☐ No difference

**21. Compared to patients treated with fixed orthodontic appliances, the oral hygiene of patients with Elastodontic Appliances is...?**

- ☐ Better
- ☐ Worse
- ☐ No difference

Section 4 – Reason for not using Elastodontic Appliances

**22. Why don't you currently use Elastodontic Appliances in your practice?**

- ☐ I don't have enough knowledge about EPA, so I prefer not to use them
- ☐ I find no application in my patients
- ☐ The costs of Elastodontic Appliances is too high for the provider
- ☐ I've used Elastodontic Appliances before, and I consider them ineffective
- ☐ I've used Elastodontic Appliances before, but patients collaboration was poor
